# Supplementary material
Source: Elsevier journal article supplement (https://www.sciencedirect.com/science/article/pii/S0213911118300013)
Supplement: mmc1 [file S0213911118300013:mmc1.docx]

**Appendix**

| **Table I**  Association between poor mental health and family and household characteristics in working population with marital status married or cohabiting stratified by gender and social class. | | | | |
| --- | --- | --- | --- | --- |
|  | **Men** | | **Women** | |
| **Nonmanual**  **aOR (CI95%)**a | **Manual**  **aOR (CI95%)**a | **Nonmanual**  **aOR (CI95%)**a | **Manual**  **aOR (CI95%)**a |
| *Main breadwinner* |  |  |  |  |
| No | 1.00 | 1.00 | 1.00 | 1.00 |
| Yes | 1.14 (0.68-1.89) | 1.02 (0.76-1.35) | 0.74 (0.46-1.18) | 1.02 (0.80-1.32) |
| *Household work* |  |  |  |  |
| Someone else | 1.00 | 1.00 | 1.00 | 1.00 |
| Yourself | 0.44 (0.10-1.95) | 1.38 (0.75-2.53) | 1.53 (0.68-3.43) | 0.79 (0.46-1.37) |
| Shared | 0.95 (0.56-1.60) | 0.87 (0.65-1.16) | 1.28 (0.59-2.77) | 0.66 (0.38-1.14) |
|  | | | | |
| aOR: adjusted odds ratio; CI95%: confidence interval of 95%.  aOdds ratios adjusted by educational level and age. | | | | |
|  | | | | |
